# Supplementary figures and images for: A well-resolved discrete dodecameric water cluster in a metal–organic complex
Source: Royal Society of Chemistry journal article supplement (doi:10.1039/b703185h), 2007-01-01

## Supplementary materials

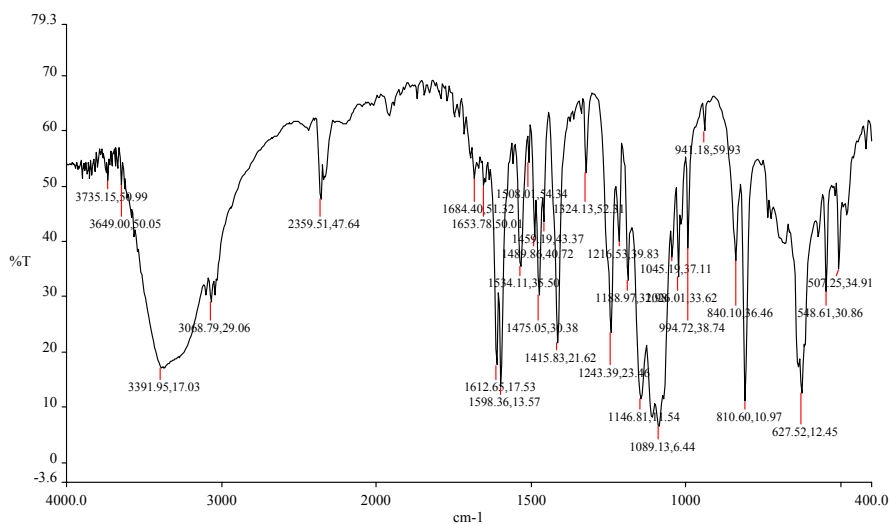

Fig. S1. IR for compound 1.

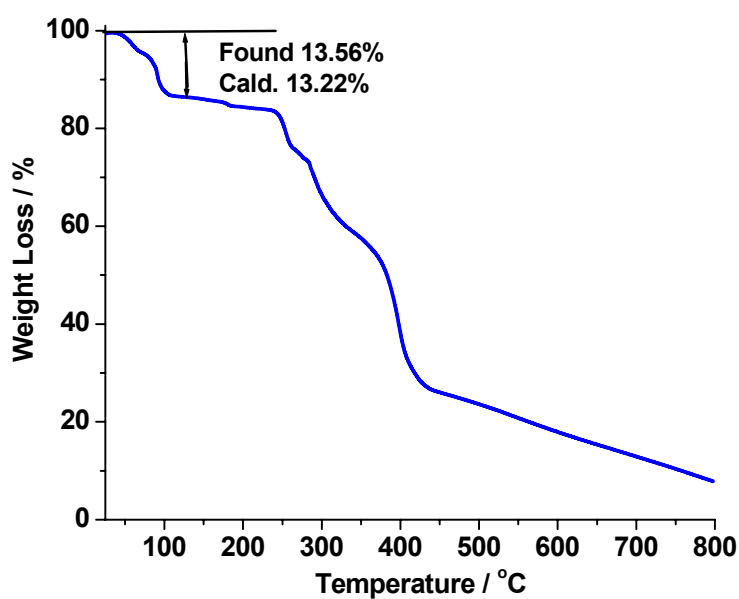

Fig. S2. TGA for compound 1.

Supplement: b703185h.pdf [file b703185h.pdf]
